# Supplementary material for: An evidence synthesis of the international knowledge base for new care models to inform and mobilise knowledge for multispecialty community providers (MCPs)
Source: Springer Nature journal article supplement (doi:10.1186/s13643-016-0346-x), 2016-09-30
Supplement: MOESM2 [file 10803750]

## Additional File 2 : Core set of potential search terms

| Features of MCP model                             | Potential search terms                                                                                                                                                                                   |
|---------------------------------------------------|----------------------------------------------------------------------------------------------------------------------------------------------------------------------------------------------------------|
| Patient-centred coordinated care                  | PATIENT CENTERED CARE/, "collaborative care", "holistic care", "integrated care planning", "patient-centred care", coordinated care                                                                      |
| GP-led out of hospital care                       | COMMUNITY HEALTH SERVICES/, GENERAL PRACTICE/, AMBULATORY CARE FACILITIES/                                                                                                                               |
| Enhanced primary care                             | "extend* primary care", "enhance* primary care"                                                                                                                                                          |
| Delivery to localities/communities/neighbourhoods | hubs, clusters, "single point of access", localit*, communit*, neighbourhood*, "third sector integration"                                                                                                |
| Integrated community teams                        | DELIVERY OF HEALTH CARE, INTEGRATED/, "multidisciplinary team*", "team* without walls", "integrated community team*", PATIENT CARE TEAM/                                                                 |
| Community mobilisation                            | mutuality, coproduction, "community resilience", "community asset-based approach", "social movement*", "community network*", "place-based commissioning", COMMUNITY NETWORKS                             |
| Common activities                                 | Potential search terms                                                                                                                                                                                   |
| Extended GP access                                | "extended adj3 hours"                                                                                                                                                                                    |
| Care navigators/wellbeing support workers         | "community anchor*", "volunteer health champion*", "peer support", "care navigator*", "wellbeing support worker"                                                                                         |
| Community based specialists                       | "community consultant*", "community adj3 specialist"                                                                                                                                                     |
| Patient activation/empowerment                    | SELF CARE/, "self management", PATIENT PARTICIPATION/, "patient adj3 empower"                                                                                                                            |
| Prevention/proactive care                         | SECONDARY PREVENTION/, TERTIARY PREVENTION/, "disruptive prevention", "proactive care"                                                                                                                   |
| Outcomes based contracting                        | "outcome*-based contract*", "outcome* based commissioning", "incentive*", "currenc*"                                                                                                                     |
| Stratification                                    | "risk stratif*", "case finding"                                                                                                                                                                          |
| Population health                                 | COMMUNITY HEALTH PLANNING/, "population health"                                                                                                                                                          |
| Organisational factors                            | Potential search terms                                                                                                                                                                                   |
| New and expanded workforce roles                  | HEALTH MANPOWER/, "expanded role*", "community pharmacist*", "physician assistant*", hospitalist*, "generic role*"                                                                                       |
| Governance and operating models                   | "accountable care organi*ation*", "accountable care system*", "primary care at scale", "federation*", "network*", "super-partnership*", "community health organi*ation*", "multi practice organi*ation*" |
